# Supplementary material
Source: PubMed Central journal article supplement (PMC10760895)
Supplement: NIHMS1952685-supplement-Supplemental_Table_1.pdf [file NIHMS1952685-supplement-Supplemental_Table_1.pdf]

Supplemental Table 1

*Bivariate Correlations Among Ineffective Arguing, Supportive Dyadic Coping by Partner, Joint Dyadic Coping and Partner Accommodation*

|               | 1       | 2       | 3       | 4      | 5       | 6       | 7       | 8      | 9       | 10     | 11     | 12     |
|---------------|---------|---------|---------|--------|---------|---------|---------|--------|---------|--------|--------|--------|
| 1. BL IAI     | .43*    | -.73*** | -.76*** | .53**  | .57*    | -.38    | -.55*   | .38    | .83***  | -.62*  | -.71** | .68**  |
| 2. BL SDCptr  | -.80*** | .32     | .85***  | -.63** | -.64**  | .70**   | .71**   | -.44+  | -.57*   | .84*** | .78**  | -.65*  |
| 3. BL JDC     | -.82*** | .77***  | .49*    | -.58** | -.56*   | .51*    | .74***  | -.27   | -.41    | .54*   | .73**  | -.47+  |
| 4. BL SORTS   | -       | -       | -       | -      | .47*    | -.39    | -.38    | .73**  | .48+    | -.40   | -.24   | .65*   |
| 5. 1M IAI     | .43+    | -.27    | -.27    | -      | .88***  | -.85*** | -.87*** | .66**  | .48+    | -.62*  | -.46   | .43    |
| 6. 1M SDCptr  | -.56*   | .58*    | .47+    | -      | -.83*** | .73**   | .83***  | -.62** | -.45    | .72**  | .55*   | -.53+  |
| 7. 1M JDC     | -.57*   | .40     | .59*    | -      | -.82*** | .82***  | .69**   | .41+   | -.26    | .54*   | .59*   | -.30   |
| 8. 1M SORTS   | -       | -       | -       | -      | -       | -       | -       | -      | .58*    | -.44   | -.09   | .61*   |
| 9. 3M IAI     | .72**   | -.60**  | -.71**  | -      | .63**   | -.68**  | -.73**  | -      | .62*    | -.75** | -.62*  | .77**  |
| 10. 3M SDCptr | -.51*   | .55*    | .57*    | -      | -.62**  | .70**   | .65**   | -      | -.85*** | .54*   | .81*** | -.75** |
| 11. 3M JDC    | -.60**  | .43+    | .75***  | -      | -.62**  | .66**   | .86***  | -      | -.75*** | .67**  | .77**  | -.51+  |
| 12. 3M SORTS  | -       | -       | -       | -      | -       | -       | -       | -      | -       | -      | -      | -      |

*Note.* BL = baseline; 1M = 1-month follow-up; 3M = 3-month follow-up; IAI = ineffective arguing; JDC = joint dyadic coping; SDCptr = supportive dyadic coping by partner; SORTS = partner accommodation; bivariate correlations for patient and partner were presented on the lower and upper diagonal, respectively; cross-partner bivariate correlations were presented on the diagonal ( $N_s = 14 - 24$ ).

+  $p < .10$ . \*  $p < .05$ . \*\*  $p < .01$ . \*\*\*  $p < .001$ .

Fredman, S. J., Le, Y., Macdonald, A., Monson, C. M., Rhoades, G. K., Dondanville, K. A., Blount, T. H., Hall-Clark, B. N., Fina, B. A., Mintz, J., Litz, B. T., Young-McCaughan, S., Jenkins, A. I. C., Yarvis, J. S., Keane, T. M., & Peterson, A. L. for the Consortium to Alleviate PTSD. A closer look at relational outcomes from a pilot study of abbreviated, intensive, multi-couple group cognitive-behavioral conjoint therapy for PTSD with military dyads. *Family Process*. Accepted March 8, 2021.
